# Supplementary material
Source: publisher figshare collection journal article supplement (https://sage.figshare.com/ndownloader/files/14606051)
Supplement: Supplementary file 1 [file 14606051]

Appendix

Independent Variables.

|  | % |
| --- | --- |
| Local Candidates | 37.9 |
| State Legislative Candidates | 21.3 |
| Judicial Candidates | 13.5 |
| Major Metropolitan area | 36.7 |
| South | 29.2 |
| Race (non-white) | 30.0 |
| Democrats | 31.1 |
| Other/Independent Party | 36.7 |
| Incumbent | 22.0 |
| Education HS | 6.7 |
| College | 41.8 |
| Law | 26.5 |
| Graduate Degree | 25.0 |
| Competitive | 56.0 |
| Women | 26.1 |
